# Supplementary material
Source: PubMed Central journal article supplement (PMC1945079)
Supplement: pbio.0050197.sd001.pdf [file pbio.0050197.sd001.pdf]

## **Protocol S1**

### **Supplementary list of flight speeds and biometry of bird species**

The table gives flight speeds and biometry for 138 species of birds in continuous flapping flight tracked by radar. Tracking details are only given for the novel data collected by the T.A. group at Lund University (102 species). Data from Bruderer and Boldt (2001, 64 species, indicated by •) are presented for their subset of birds in continuous flapping flight.

The following data referring to speeds are listed: mean equivalent airspeed ( $U_e$ ), standard deviation of  $U_e$ , mean vertical speed ( $U_z$ ), number of tracks (n) and total track time for the radar recordings. For the data from Bruderer and Boldt (2001) only mean  $U_e$  and number of tracks, included into the present analysis, are given (for further details see Bruderer & Boldt 2001).

Data on biometry is based on a review of 33610 measurements of body mass, wingspan or wing area, where all measurements of a given parameter refer to unique birds. The contribution of each source on the species level was: Dunning (1993, 135 species), Magnan (1922, 87), Bruderer and Boldt (2001, 82), Pennycuick (1999, 57), Greenewalt (1962, 55), Hedenström, A. (unpubl., 31), Hedenström (1994, 14), Strandberg, R. (unpubl., 6), Cramp et al. (1977-94, 2), Hedenström (1999, 1), Hedenström (1992, 1) and Rosén, M. (unpubl., 1). Weighted averages are given in the table and the total mean is the mean of all species.

The following information referring to biometry are listed: Number of body mass measurements, mean total body mass of a fresh killed or live bird (kg), number of wing span measurements, mean wing span ( $b$ ; maximum wingtip to wingtip distance on a bird in the hand, in metres), number of wing area measurements, wing area ( $S$ ; projected area of both wings when fully stretched including the area of the body between the wings,  $m^2$ ). Data was selected to compare with the methods of measuring birds by Pennycuick (1999) and was used as is from all authors except from Greenewalt (1962: Table 8). Here, the wing area was corrected (increased) by using 'wing spread' instead of 'length of both wings' given a constant aspect ratio ( $b^2/S$ ), and only 'wing spread' was used as a measure of wingspan (cf.

Greenewalt, 1962). Species are arranged into six main phylogenetic groups according to the phylogeny of Ericson et al. (2006).

References in this protocol:

- Bruderer, B. & Boldt, A. (2001) Flight characteristics of birds: 1. radar measurements of speeds. *Ibis* **143**:178-204.
- Cramp, S., Simmons, K.E.L & Perrins, C.M. , eds. (1977-94) *The Birds of the Western Palearctic*, vol 1-9 (Oxford University Press).
- Ericson, P.G.P., Anderson, C.L., Britton, T., Elzanowski, A., Johansson, U.S., Källersjö, M., Ohlson, J.I., Parsons, T.J., Zuccon, D. & Mayr, G. (2006) Diversification of Neoaves: integration of molecular sequence data and fossils. *Biol. Lett.* **2**: 543-547.
- Dunning, J.B. (1993) *CRC Handbook of Avian Bodymasses* (CRC Press, Boca Raton).
- Greenewalt, C.H. (1962) Dimensional relationships for flying animals. *Smithsonian miscellaneous collections* **144**(2): 1-46.
- Hedenström, A. & Ålerstam, T. (1992) Climbing performance of migrating birds as a basis for estimating limits for fuel-carrying capacity and muscle work. *J. exp. Biol.* **164**: 19-38.
- Hedenström, A. (1994) Flight strategies in Arctic Birds. In *Tundra Ecology 1994: A Cruise Report* (Swedish Polar Research Secretariat, Stockholm).
- Hedenström, A., Rosén, M., Åkesson, S. & Spina, F. (1999) Flight performance during hunting excursions in the Eleonora's falcon *Falco eleonora*. *J. exp. Biol.* **202**: 2029-2039.
- Magnan, A. (1922) Les caractéristiques des oiseaux suivant le mode de vol. *Ann. Sci. Nat.* **10**(5): 125-134.
- Pennycuick, C.J. (1999) *Measuring birds' wings for flight performance calculations*, 2nd edition (Boundary Layer Publications, Bristol).

| Taxon                                               | Species                         | U <sub>0</sub><br>(m/s) | sd<br>(m/s) | U <sub>z</sub><br>(m/s) | N<br>(tracks) | Track-<br>time (s) | N<br>(mass) | Mass<br>(kg) | N<br>(b) | b<br>(m) | N<br>(S) | S<br>(m <sup>2</sup> ) |
|-----------------------------------------------------|---------------------------------|-------------------------|-------------|-------------------------|---------------|--------------------|-------------|--------------|----------|----------|----------|------------------------|
| Swans, geese & ducks                                | <i>Cygnus olor</i>              | 16.2                    | 1.6         | 0.1                     | 24            | 8540               | 115         | 10.597       | 21       | 2.30     | 9        | 0.6504                 |
|                                                     | <i>Cygnus columbianus</i>       | 18.5                    |             | 0.4                     | 1             | 440                | 167         | 6.637        | 12       | 1.98     | 11       | 0.4608                 |
|                                                     | <i>Cygnus cygnus</i>            | 17.3                    | 2.0         | -0.1                    | 10            | 3969               | 25          | 8.689        | 19       | 2.29     | 18       | 0.6045                 |
|                                                     | <i>Anser fabalis</i>            | 17.3                    | 2.7         | 0.0                     | 44            | 14600              | 127         | 3.035        | 1        | 1.62     | 1        | 0.2675                 |
|                                                     | <i>Anser albifrons</i>          | 16.1                    | 2.0         | 0.1                     | 5             | 1255               | 169         | 2.582        | 1        | 1.41     | 1        | 0.1835                 |
|                                                     | <i>Anser anser</i>              | 17.1                    | 2.6         | 0.0                     | 21            | 10100              | 176         | 3.326        | 7        | 1.55     | 6        | 0.3079                 |
|                                                     | <i>Branta canadensis</i>        | 16.7                    |             | 0.2                     | 1             | 180                | 395         | 3.628        | 4        | 1.69     | 4        | 0.3717                 |
|                                                     | <i>Branta leucopsis</i>         | 17.0                    | 2.2         | 0.0                     | 22            | 10740              | 620         | 1.705        | 1        | 1.08     | 1        | 0.1150                 |
|                                                     | <i>Branta bernicla</i>          | 17.7                    | 2.8         | 0.1                     | 97            | 45450              | 792         | 1.306        | 3        | 1.01     | 3        | 0.1129                 |
|                                                     | <i>Tadorna tadorna</i>          | 15.4                    |             | 0.0                     | 1             | 120                | 16          | 1.193        |          |          |          |                        |
|                                                     | <i>Anas penelope</i>            | 20.6                    | 2.1         | 0.1                     | 36            | 15300              | 77          | 0.783        | 11       | 0.82     | 11       | 0.0814                 |
|                                                     | <i>Anas crecca</i>              | 19.7                    | 4.0         | 0.2                     | 9             | 3050               | 281         | 0.348        | 6        | 0.59     | 5        | 0.0428                 |
|                                                     | <i>Anas platyrhynchos</i>       | 18.5                    | 2.3         | 0.3                     | 22            | 7470               | 5871        | 1.082        | 24       | 0.88     | 24       | 0.1062                 |
|                                                     | <i>Anas acuta</i>               | 20.6                    | 2.6         | 0.4                     | 6             | 1920               | 294         | 1.024        | 2        | 0.90     | 2        | 0.0879                 |
|                                                     | <i>Aythya ferina</i>            | 23.6                    |             | 0.7                     | 1             | 190                | 322         | 0.823        | 1        | 0.77     | 1        | 0.0615                 |
|                                                     | <i>Aythya fuligula</i>          | 21.1                    | 1.1         | 0.7                     | 3             | 670                | 1044        | 0.694        | 1        | 0.71     | 1        | 0.0474                 |
|                                                     | <i>Aythya marila</i>            | 21.3                    |             | 1.1                     | 1             | 150                | 27          | 0.931        | 1        | 0.82     | 1        | 0.0621                 |
|                                                     | <i>Somateria mollissima</i>     | 17.9                    | 2.4         | 0.0                     | 240           | 79218              | 56          | 2.015        | 2        | 0.98     | 2        | 0.1310                 |
|                                                     | <i>Somateria spectabilis</i>    | 16.0                    | 0.3         | -0.2                    | 2             | 740                | 183         | 1.591        | 1        | 0.93     | 1        | 0.1080                 |
|                                                     | <i>Polysticta stelleri</i>      | 21.9                    |             | -0.1                    | 1             | 310                | 90          | 0.805        |          |          |          |                        |
|                                                     | <i>Clangula hyemalis</i>        | 22.0                    | 1.4         | 0.1                     | 3             | 510                | 1299        | 0.874        | 2        | 0.71     | 2        | 0.0669                 |
|                                                     | <i>Melanitta nigra</i>          | 22.1                    | 4.0         | -0.1                    | 14            | 5220               | 13          | 0.990        | 1        | 0.85     | 1        | 0.0679                 |
|                                                     | <i>Melanitta fusca</i>          | 20.1                    | 4.7         | 0.0                     | 32            | 10760              | 13          | 1.743        | 1        | 0.97     | 1        | 0.1010                 |
| <i>Bucephala clangula</i>                           | 20.3                            | 3.8                     | 0.3         | 10                      | 4560          | 113                | 0.901       | 2            | 0.70     | 2        | 0.0598   |                        |
| <i>Mergus serrator</i>                              | 20.0                            | 2.9                     | 0.2         | 33                      | 13430         | 37                 | 1.004       | 2            | 0.87     | 2        | 0.0678   |                        |
| <i>Mergus merganser</i>                             | 19.7                            | 1.1                     | 0.1         | 2                       | 420           | 26                 | 1.489       | 2            | 0.93     | 2        | 0.0767   |                        |
| Flamingo, pigeons & swifts                          | <i>Phoenicopterus ruber</i> •   | 15.2                    |             |                         | 3             |                    | 26          | 3.053        | 1        | 1.53     | 1        | 0.2715                 |
|                                                     | <i>Columba oenas</i>            | 15.8                    | 2.0         | 0.1                     | 8             | 1830               | 20          | 0.295        | 1        | 0.75     | 1        | 0.0532                 |
|                                                     | <i>Columba palumbus</i>         | 16.3                    | 2.3         | 0.3                     | 87            | 45920              | 522         | 0.490        | 3        | 0.75     | 3        | 0.0842                 |
|                                                     | <i>Columba palumbus</i> •       | 17.6                    |             |                         | 11            |                    |             |              |          |          |          |                        |
|                                                     | <i>Apus apus</i>                | 9.7                     | 2.0         | 0.4                     | 34            | 18570              | 230         | 0.038        | 14       | 0.40     | 13       | 0.0168                 |
|                                                     | <i>Apus apus</i> •              | 10.6                    |             |                         | 163           |                    |             |              |          |          |          |                        |
|                                                     | <i>Apus pallidus</i> •          | 10.5                    |             |                         | 33            |                    | 661         | 0.042        | 1        | 0.44     | 1        | 0.0263                 |
| <i>Apus melba</i> •                                 | 12.6                            |                         |             | 36                      |               | 13                 | 0.078       | 1            | 0.57     | 1        | 0.0304   |                        |
| Waders, gulls & terns                               | <i>Haematopus ostralegus</i>    | 13.0                    | 2.5         | 0.2                     | 19            | 9930               | 293         | 0.523        | 6        | 0.82     | 4        | 0.0810                 |
|                                                     | <i>Charadrius hiaticula</i>     | 19.5                    |             | 0.4                     | 1             | 130                | 84          | 0.064        | 9        | 0.41     | 9        | 0.0179                 |
|                                                     | <i>Pluvialis dominica</i>       | 13.7                    |             | 0.2                     | 1             | 790                | 60          | 0.145        |          |          |          |                        |
|                                                     | <i>Pluvialis squatarola</i>     | 17.9                    | 3.9         | 0.1                     | 14            | 4870               | 37          | 0.219        | 6        | 0.62     | 6        | 0.0420                 |
|                                                     | <i>Vanellus vanellus</i>        | 12.8                    | 1.3         | 0.0                     | 14            | 3380               | 79          | 0.219        | 4        | 0.75     | 2        | 0.0744                 |
|                                                     | <i>Vanellus vanellus</i> •      | 11.9                    |             |                         | 2             |                    |             |              |          |          |          |                        |
|                                                     | <i>Calidris canutus</i>         | 20.1                    | 1.9         | -0.2                    | 7             | 2990               | 42          | 0.128        | 20       | 0.50     | 19       | 0.0286                 |
|                                                     | <i>Calidris alpina</i>          | 15.3                    | 1.9         | 0.5                     | 36            | 13578              | 652         | 0.054        | 23       | 0.36     | 23       | 0.0156                 |
|                                                     | <i>Philomachus pugnax</i>       | 17.4                    | 1.0         | -0.1                    | 3             | 1120               | 270         | 0.114        | 9        | 0.55     | 9        | 0.0388                 |
|                                                     | <i>Philomachus pugnax</i> •     | 13.6                    |             |                         | 3             |                    |             |              |          |          |          |                        |
|                                                     | <i>Gallinago gallinago</i>      | 17.1                    | 2.7         | 0.0                     | 22            | 5660               | 37          | 0.132        | 7        | 0.52     | 6        | 0.0476                 |
|                                                     | <i>Limosa lapponica</i>         | 18.3                    | 2.1         | 0.2                     | 15            | 7710               | 94          | 0.318        | 1        | 0.73     | 1        | 0.0520                 |
|                                                     | <i>Numerius phaeopus</i>        | 16.3                    | 0.9         | 0.2                     | 4             | 1260               | 66          | 0.383        | 1        | 1.07     | 1        | 0.1365                 |
|                                                     | <i>Numerius arquata</i>         | 16.3                    | 2.3         | 0.3                     | 16            | 7040               | 231         | 0.794        | 6        | 0.97     | 2        | 0.1182                 |
|                                                     | <i>Tringa nebularia</i>         | 12.3                    | 3.3         | 0.1                     | 5             | 1290               | 52          | 0.174        | 1        | 0.61     | 1        | 0.0406                 |
|                                                     | <i>Tringa glareola</i>          | 9.6                     | 1.7         | 1.1                     | 3             | 980                | 31          | 0.066        | 4        | 0.40     | 4        | 0.0203                 |
|                                                     | <i>Arenaria interpres</i>       | 14.9                    | 0.7         | 0.7                     | 2             | 630                | 35          | 0.111        | 11       | 0.47     | 11       | 0.0252                 |
|                                                     | <i>Phalaropus lobatus</i>       | 13.1                    |             | 0.2                     | 1             | 230                | 61          | 0.033        | 4        | 0.34     | 4        | 0.0146                 |
|                                                     | <i>Phalaropus fulicarius</i>    | 12.4                    | 2.3         | -0.1                    | 6             | 1000               | 216         | 0.054        | 6        | 0.42     | 6        | 0.0196                 |
|                                                     | <i>Stercorarius pomarinus</i>   | 15.2                    | 2.3         | 0.2                     | 16            | 5320               | 128         | 0.688        | 3        | 1.18     |          |                        |
|                                                     | <i>Stercorarius parasiticus</i> | 13.8                    | 2.2         | -0.2                    | 7             | 1500               | 45          | 0.438        | 17       | 1.06     | 16       | 0.1175                 |
|                                                     | <i>Stercorarius longicaudus</i> | 13.6                    | 1.9         | 0.6                     | 3             | 1550               | 48          | 0.297        | 4        | 1.00     | 4        | 0.0891                 |
|                                                     | <i>Larus minutus</i>            | 11.5                    | 0.1         | 0.2                     | 2             | 610                | 87          | 0.118        |          |          |          |                        |
|                                                     | <i>Larus ridibundus</i>         | 11.9                    | 1.6         | 0.0                     | 19            | 6190               | 352         | 0.283        | 28       | 0.97     | 28       | 0.0976                 |
|                                                     | <i>Larus canus</i>              | 13.4                    | 2.9         | 0.1                     | 36            | 14050              | 176         | 0.411        | 5        | 1.11     | 3        | 0.1246                 |
|                                                     | <i>Larus fuscus</i>             | 13.1                    | 1.9         | -0.2                    | 11            | 3150               | 130         | 0.719        | 14       | 1.34     | 14       | 0.1934                 |
|                                                     | <i>Larus fuscus</i> •           | 11.9                    |             |                         | 11            |                    |             |              |          |          |          |                        |
|                                                     | <i>Larus argentatus</i>         | 12.8                    | 1.8         | 0.0                     | 18            | 7210               | 374         | 1.142        | 11       | 1.34     | 11       | 0.1968                 |
|                                                     | <i>Larus glaucooides</i>        | 15.9                    |             | -0.2                    | 1             | 140                | 3           | 0.819        |          |          |          |                        |
|                                                     | <i>Larus hyperboreus</i>        | 13.4                    | 0.8         | 0.1                     | 3             | 530                | 65          | 1.445        |          |          |          |                        |
|                                                     | <i>Larus marinus</i>            | 13.7                    | 1.2         | -0.2                    | 4             | 700                | 219         | 1.669        | 10       | 1.67     | 10       | 0.2881                 |
|                                                     | <i>Rissa tridactyla</i>         | 13.1                    | 0.4         | -0.1                    | 2             | 660                | 411         | 0.408        | 6        | 0.96     | 6        | 0.0953                 |
|                                                     | <i>Sterna caspia</i>            | 12.1                    |             | 0.6                     | 1             | 210                | 84          | 0.655        |          |          |          |                        |
| <i>Sterna paradisaea</i>                            | 10.9                            | 0.9                     | 0.4         | 2                       | 500           | 262                | 0.110       | 1            | 0.80     | 1        | 0.0571   |                        |
| <i>Chlidonias leucopterus</i> •                     | 12.0                            |                         |             | 1                       | 111           | 111                | 0.054       | 1            | 0.65     | 1        | 0.0545   |                        |
| Divers, cormorants, pelican, herons, storks & crane | <i>Gavia stellata</i>           | 18.6                    | 3.9         | 0.0                     | 7             | 3660               | 13          | 1.505        | 1        | 1.04     | 1        | 0.0890                 |
|                                                     | <i>Gavia arctica</i>            | 19.3                    | 2.1         | 0.1                     | 13            | 3710               | 5           | 2.543        | 1        | 1.20     | 1        | 0.1196                 |
|                                                     | <i>Gavia adamsii</i>            | 18.7                    | 0.5         | 0.4                     | 2             | 220                | 7           | 5.500        |          |          |          |                        |
|                                                     | <i>Phalacrocorax carbo</i>      | 15.2                    | 3.0         | 0.1                     | 35            | 13410              | 62          | 2.227        | 9        | 1.40     | 9        | 0.2240                 |
|                                                     | <i>Pelecanus onocrotalus</i> •  | 15.6                    |             |                         | 1             |                    | 7           | 8.504        | 5        | 2.91     | 4        | 0.9554                 |
|                                                     | <i>Botaurus stellaris</i>       | 8.8                     |             | 1.0                     | 1             | 340                | 4           | 1.133        | 2        | 1.26     | 2        | 0.2727                 |
|                                                     | <i>Nycticorax nycticorax</i> •  | 11.2                    |             |                         | 4             |                    | 8           | 0.763        | 3        | 1.06     | 2        | 0.1589                 |
|                                                     | <i>Ardeola ralloides</i> •      | 11.7                    |             |                         | 1             |                    | 24          | 0.287        | 1        | 0.86     | 1        | 0.1114                 |
|                                                     | <i>Egretta alba</i> •           | 10.2                    |             |                         | 2             |                    | 27          | 0.888        | 6        | 1.44     | 4        | 0.2443                 |
|                                                     | <i>Ardea cinerea</i>            | 12.5                    | 2.2         | 0.1                     | 14            | 4840               | 34          | 1.439        | 3        | 1.73     | 3        | 0.3716                 |
|                                                     | <i>Ardea cinerea</i> •          | 11.2                    |             |                         | 49            |                    |             |              |          |          |          |                        |
|                                                     | <i>Ardea purpurea</i> •         | 10.8                    |             |                         | 12            |                    | 3           | 0.906        | 1        | 1.35     | 1        | 0.2488                 |
|                                                     | <i>Ciconia nigra</i> •          | 16.0                    |             |                         | 6             |                    | 2           | 3.000        | 1        | 1.50     | 1        | 0.2842                 |
|                                                     | <i>Ciconia ciconia</i> •        | 16.0                    |             |                         | 6             |                    | 72          | 3.432        | 4        | 1.91     | 3        | 0.5326                 |
|                                                     | <i>Plegadis falcinellus</i> •   | 12.6                    |             |                         | 5             |                    | 4           | 0.566        | 2        | 0.89     | 1        | 0.0986                 |
|                                                     | <i>Platalea leucorodia</i> •    | 14.1                    |             |                         | 7             |                    | 9           | 1.857        | 2        | 1.30     | 2        | 0.2415                 |
|                                                     | <i>Porzana porzana</i>          | 13.9                    |             | -0.1                    | 1             | 100                | 18          | 0.078        | 2        | 0.38     | 2        | 0.0236                 |
|                                                     | <i>Grus grus</i>                | 15.0                    | 2.7         | -0.2                    | 12            | 6010               | 19          | 5.614        | 2        | 2.22     | 2        | 0.5855                 |
|                                                     | <i>Grus grus</i> •              | 13.6                    |             |                         | 1             |                    |             |              |          |          |          |                        |

|                                   |                                 |      |      |      |       |      |       |       |      |      |        |        |
|-----------------------------------|---------------------------------|------|------|------|-------|------|-------|-------|------|------|--------|--------|
| Falcons, crows & songbirds        | <i>Falco naumanni</i> •         | 11.3 |      |      | 12    |      | 60    | 0.151 | 1    | 0.65 | 1      | 0.0611 |
|                                   | <i>Falco tinnunculus</i>        | 10.1 | 0.2  |      | 1     | 120  | 105   | 0.203 | 7    | 0.73 | 5      | 0.0708 |
|                                   | <i>Falco vespertinus</i> •      | 12.8 |      |      | 4     |      | 11    | 0.165 | 1    | 0.72 | 1      | 0.0728 |
|                                   | <i>Falco subbuteo</i> •         | 11.3 |      |      | 20    |      | 14    | 0.238 | 6    | 0.74 | 6      | 0.0667 |
|                                   | <i>Falco eleonorae</i> •        | 12.8 |      |      | 2     |      | 22    | 0.387 | 2    | 0.95 | 2      | 0.1041 |
|                                   | <i>Falco peregrinus</i> •       | 12.1 |      |      | 13    |      | 51    | 0.789 | 20   | 1.02 | 19     | 0.1257 |
|                                   | <i>Lullula arborea</i> •        | 9.8  |      |      | 1     |      | 962   | 0.027 | 1    | 0.29 | 1      | 0.0164 |
|                                   | <i>Alauda arvensis</i>          | 15.1 | 2.1  | -0.4 | 15    | 2880 | 393   | 0.039 | 5    | 0.35 | 5      | 0.0207 |
|                                   | <i>Alauda arvensis</i> •        | 12.7 |      |      | 20    |      |       |       |      |      |        |        |
|                                   | <i>Riparia riparia</i>          | 14.3 |      | 0.6  | 1     | 140  | 250   | 0.015 | 4    | 0.27 | 4      | 0.0096 |
|                                   | <i>Riparia riparia</i> •        | 11.3 |      |      | 9     |      |       |       |      |      |        |        |
|                                   | <i>Hirundo rupestris</i> •      | 9.9  |      |      | 1     |      | 10    | 0.019 | 3    | 0.32 | 2      | 0.0116 |
|                                   | <i>Hirundo rustica</i>          | 10.0 | 2.0  | -0.4 | 2     | 700  | 2343  | 0.016 | 6    | 0.32 | 6      | 0.0136 |
|                                   | <i>Hirundo rustica</i> •        | 11.3 |      |      | 108   |      |       |       |      |      |        |        |
|                                   | <i>Delichon urbica</i>          | 9.7  | 0.5  | -0.1 | 2     | 390  | 256   | 0.015 | 3    | 0.29 | 3      | 0.0104 |
|                                   | <i>Delichon urbica</i> •        | 11.0 |      |      | 76    |      |       |       |      |      |        |        |
|                                   | <i>Anthus trivialis</i>         | 12.7 | 2.2  | 0.2  | 4     | 1170 | 438   | 0.022 | 2    | 0.27 | 2      | 0.0126 |
|                                   | <i>Anthus trivialis</i> •       | 12.0 |      |      | 4     |      |       |       |      |      |        |        |
|                                   | <i>Anthus pratensis</i> •       | 10.5 |      |      | 6     |      | 232   | 0.018 | 4    | 0.26 | 4      | 0.0123 |
|                                   | <i>Motacilla flava</i> •        | 12.7 |      |      | 7     |      | 164   | 0.018 | 2    | 0.26 | 1      | 0.0103 |
|                                   | <i>Motacilla alba</i>           | 14.1 | 1.9  | -0.3 | 5     | 610  | 101   | 0.021 | 8    | 0.26 | 8      | 0.0119 |
|                                   | <i>Motacilla alba</i> •         | 13.0 |      |      | 13    |      |       |       |      |      |        |        |
|                                   | <i>Prunella modularis</i> •     | 12.2 |      |      | 1     |      | 541   | 0.020 | 14   | 0.21 | 14     | 0.0090 |
|                                   | <i>Oenanthe oenanthe</i> •      | 12.8 |      |      | 1     |      | 73    | 0.023 | 6    | 0.28 | 6      | 0.0143 |
|                                   | <i>Turdus pilaris</i>           | 13.0 | 2.9  | 0.2  | 15    | 6970 | 76    | 0.105 | 7    | 0.42 | 7      | 0.0299 |
|                                   | <i>Turdus pilaris</i> •         | 12.4 |      |      | 6     |      |       |       |      |      |        |        |
|                                   | <i>Turdus philomelos</i>        | 11.0 | 2.1  | 0.4  | 6     | 2490 | 290   | 0.068 | 21   | 0.36 | 21     | 0.0218 |
|                                   | <i>Turdus philomelos</i> •      | 11.7 |      |      | 8     |      |       |       |      |      |        |        |
|                                   | <i>Turdus iliacus</i>           | 13.8 | 1.8  | 0.3  | 6     | 1450 | 317   | 0.061 | 35   | 0.36 | 35     | 0.0223 |
|                                   | <i>Turdus viscivorus</i>        | 11.9 | 3.3  | -0.4 | 3     | 600  | 21    | 0.114 | 2    | 0.44 | 2      | 0.0333 |
|                                   | <i>Turdus viscivorus</i> •      | 12.4 |      |      | 2     |      |       |       |      |      |        |        |
|                                   | <i>Parus ater</i>               | 10.6 | 2.3  | 0.1  | 2     | 160  | 51    | 0.009 | 1    | 0.18 | 1      | 0.0073 |
|                                   | <i>Parus major</i> •            | 13.6 |      |      | 1     |      | 63    | 0.019 | 13   | 0.23 | 13     | 0.0109 |
|                                   | <i>Garrulus glandarius</i>      | 6.7  | 1.0  | 0.2  | 2     | 310  | 60    | 0.162 | 5    | 0.54 | 5      | 0.0644 |
|                                   | <i>Garrulus glandarius</i> •    | 12.9 |      |      | 2     |      |       |       |      |      |        |        |
|                                   | <i>Nucifraga caryocatactes</i>  | 13.4 | 2.8  | -0.1 | 2     | 370  | 72    | 0.173 | 2    | 0.58 | 2      | 0.0584 |
|                                   | <i>Corvus monedula</i>          | 12.5 | 2.6  | 0.0  | 13    | 3260 | 202   | 0.245 | 5    | 0.65 | 3      | 0.0684 |
|                                   | <i>Corvus monedula</i> •        | 14.7 |      |      | 3     |      |       |       |      |      |        |        |
|                                   | <i>Corvus frugilegus</i>        | 11.5 | 1.2  | 0.1  | 16    | 4870 | 79    | 0.488 | 3    | 0.93 | 2      | 0.1380 |
|                                   | <i>Corvus frugilegus</i> •      | 13.0 |      |      | 8     |      |       |       |      |      |        |        |
|                                   | <i>Corvus corone</i>            | 13.5 | 2.6  | 0.0  | 5     | 1260 | 147   | 0.566 | 6    | 0.91 | 5      | 0.1378 |
|                                   | <i>Corvus corax</i>             | 14.3 | 0.9  | -0.1 | 5     | 1325 | 10    | 1.149 | 2    | 1.21 | 1      | 0.2472 |
|                                   | <i>Stumus vulgaris</i>          | 16.2 | 4.3  | -0.5 | 4     | 1360 | 2875  | 0.083 | 17   | 0.38 | 14     | 0.0244 |
|                                   | <i>Stumus vulgaris</i> •        | 12.4 |      |      | 9     |      |       |       |      |      |        |        |
|                                   | <i>Fringilla coelebs</i>        | 12.8 | 1.9  | 0.2  | 23    | 8410 | 169   | 0.022 | 18   | 0.26 | 18     | 0.0132 |
|                                   | <i>Fringilla coelebs</i> •      | 12.8 |      |      | 52    |      |       |       |      |      |        |        |
|                                   | <i>Fringilla montifringilla</i> | 15.0 | 2.9  | -0.9 | 4     | 1110 | 63    | 0.024 | 13   | 0.27 | 13     | 0.0126 |
| <i>Fringilla montifringilla</i> • | 11.6                            |      |      | 2    |       |      |       |       |      |      |        |        |
| <i>Carduelis chloris</i> •        | 12.2                            |      |      | 1    |       | 25   | 0.028 | 6     | 0.25 | 6    | 0.0123 |        |
| <i>Carduelis carduelis</i> •      | 12.8                            |      |      | 3    |       | 53   | 0.016 | 3     | 0.24 | 3    | 0.0093 |        |
| <i>Carduelis spinus</i>           | 14.5                            | 1.6  | -0.3 | 60   | 20150 | 59   | 0.014 | 9     | 0.21 | 9    | 0.0076 |        |
| <i>Carduelis spinus</i> •         | 12.4                            |      |      | 2    |       |      |       |       |      |      |        |        |
| <i>Carduelis cannabina</i>        | 14.8                            | 4.5  | -0.2 | 2    | 800   | 53   | 0.015 | 2     | 0.24 | 2    | 0.0095 |        |
| <i>Pyrrhula pyrrhula</i>          | 13.4                            |      | 0.9  | 1    | 300   | 39   | 0.022 | 5     | 0.27 | 5    | 0.0136 |        |
| <i>Pernis apivorus</i>            | 12.5                            | 2.3  | -0.3 | 13   | 1860  | 28   | 0.778 | 10    | 1.26 | 10   | 0.2471 |        |
| <i>Pernis apivorus</i> •          | 10.1                            |      |      | 16   |       |      |       |       |      |      |        |        |
| <i>Milvus migrans</i> •           | 11.7                            |      |      | 7    |       | 33   | 0.815 | 2     | 1.52 | 1    | 0.2805 |        |
| <i>Milvus milvus</i>              | 12.0                            | 0.3  | -0.5 | 2    | 400   | 17   | 1.012 | 3     | 1.66 | 3    | 0.3248 |        |
| <i>Haliaeetus albicilla</i>       | 13.6                            | 0.9  | -0.2 | 2    | 200   | 34   | 4.967 | 4     | 2.18 | 4    | 0.8824 |        |
| <i>Neophron percnopterus</i> •    | 12.6                            |      |      | 3    |       | 11   | 2.062 | 2     | 1.65 | 1    | 0.3555 |        |
| <i>Circus aeruginosus</i>         | 11.2                            | 1.6  | -0.5 | 2    | 200   | 56   | 0.653 | 11    | 1.16 | 11   | 0.2040 |        |
| <i>Circus aeruginosus</i> •       | 10.1                            |      |      | 22   |       |      |       |       |      |      |        |        |
| <i>Circus cyaneus</i>             | 9.1                             | 0.7  | -0.2 | 2    | 180   | 363  | 0.433 | 3     | 1.10 | 3    | 0.1568 |        |
| <i>Circus macrourus</i> •         | 9.6                             |      |      | 3    |       | 23   | 0.420 | 2     | 1.09 | 2    | 0.1483 |        |
| <i>Circus pygargus</i> •          | 8.4                             |      |      | 1    |       | 22   | 0.291 | 3     | 1.09 | 3    | 0.1350 |        |
| <i>Accipiter nisus</i>            | 11.3                            | 1.9  | -0.1 | 12   | 3040  | 361  | 0.277 | 46    | 0.67 | 43   | 0.0768 |        |
| <i>Accipiter nisus</i> •          | 10.0                            |      |      | 64   |       |      |       |       |      |      |        |        |
| <i>Accipiter brevipes</i> •       | 11.1                            |      |      | 57   |       | 10   | 0.195 | 1     | 0.70 | 1    | 0.0739 |        |
| <i>Buteo buteo</i>                | 11.6                            | 2.7  | -0.1 | 10   | 4200  | 491  | 0.885 | 15    | 1.24 | 14   | 0.2689 |        |
| <i>Buteo buteo</i> •              | 13.3                            |      |      | 13   |       |      |       |       |      |      |        |        |
| <i>Buteo lagopus</i>              | 10.5                            | 0.0  | -0.2 | 2    | 1120  | 279  | 0.943 | 8     | 1.35 | 7    | 0.3324 |        |
| <i>Aquila pomarina</i> •          | 11.7                            |      |      | 2    |       | 38   | 1.391 | 1     | 1.47 | 1    | 0.5153 |        |
| <i>Aquila nipalensis</i> •        | 7.7                             |      |      | 1    |       | 1    | 2.900 | 1     | 2.03 | 1    | 0.4853 |        |
| <i>Aquila chrysaetos</i>          | 11.9                            |      | -0.5 | 1    | 40    | 61   | 4.069 | 13    | 2.03 | 11   | 0.5970 |        |
| <i>Hieraetus pennatus</i> •       | 11.3                            |      |      | 2    |       | 24   | 0.828 | 1     | 1.11 | 1    | 0.2004 |        |
| <i>Pandion haliaetus</i>          | 13.3                            | 2.7  | 0.0  | 5    | 1030  | 49   | 1.578 | 23    | 1.60 | 22   | 0.3201 |        |
| <i>Pandion haliaetus</i> •        | 11.4                            |      |      | 10   |       |      |       |       |      |      |        |        |
| <i>Merops apiaster</i> •          | 12.2                            |      |      | 28   |       | 384  | 0.057 | 1     | 0.47 | 1    | 0.0273 |        |
| <b>Mean (species)</b>             | 14.1                            |      |      | 17   |       | 232  | 1.065 | 6     | 0.91 | 6    | 0.1442 |        |
